# Supplementary material
Source: publisher figshare collection journal article supplement (https://acs.figshare.com/ndownloader/files/3816508)
Supplement: Supplementary file 1 [file 3816508]

data_LI2B10D10_295K_publ

_audit_creation_method  "from EXP file using GSAS2CIF"
_audit_creation_date                   2014-10-20T12:59

_pd_phase_name                         Li2B10H10_P6422
_cell_length_a                         7.03631(20)
_cell_length_b                         7.03631
_cell_length_c                         14.9154(6)
_cell_angle_alpha                      90.0
_cell_angle_beta                       90.0
_cell_angle_gamma                      120.0
_cell_volume                           639.52(4)
_cell_measurement_temperature          295
_symmetry_cell_setting                 hexagonal
_symmetry_space_group_name_H-M         "P 64 2 2"
loop_ _symmetry_equiv_pos_site_id _symmetry_equiv_pos_as_xyz
       1 +x,+y,+z 
       2 x-y,+x,+z+2/3 
       3 -y,x-y,+z+1/3 
       4 -x,-y,+z 
       5 y-x,-x,+z+2/3 
       6 +y,y-x,+z+1/3 
       7 x-y,-y,-z 
       8 +x,x-y,-z+2/3 
       9 +y,+x,-z+1/3 
      10 y-x,+y,-z 
      11 -x,y-x,-z+2/3 
      12 -y,-x,-z+1/3 

# ATOMIC COORDINATES AND DISPLACEMENT PARAMETERS


loop_
      _atom_site_type_symbol
      _atom_site_label
      _atom_site_fract_x
      _atom_site_fract_y
      _atom_site_fract_z
      _atom_site_occupancy
      _atom_site_thermal_displace_type
      _atom_site_U_iso_or_equiv
      _atom_site_symmetry_multiplicity
Li Li1  0.5        0.5          0.4217(12)   1.0    Uiso   0.042(4)      6
B B1  0.6960(4)    0.34800(22)  0.33333      1.0    Uiso   0.0207(4)     6
B B2  0.87597(31)  0.60812(32)  0.36624(15)  1.0    Uiso   0.0207(4)    12
B B3  0.87768(30)  0.36929(30)  0.41359(14)  1.0    Uiso   0.0207(4)    12
D D1  0.4998(7)    0.24990(35)  0.33333      1.0    Uiso   0.0373(6)     6
D D2  0.8193(6)    0.7314(6)    0.39601(26)  1.0    Uiso   0.0373(6)    12
D D3  0.8071(6)    0.2701(6)    0.48235(23)  1.0    Uiso   0.0373(6)    12
 
_chemical_formula_sum                  "B5 D5 Li"
_chemical_formula_weight               71.06
_cell_formula_units_Z                  6

# MOLECULAR GEOMETRY

loop_
      _geom_bond_atom_site_label_1
      _geom_bond_atom_site_label_2
      _geom_bond_distance
      _geom_bond_site_symmetry_1
      _geom_bond_site_symmetry_2
      _geom_bond_publ_flag
  D1        B1                1.196(4)  .      1_555  N
  D1        Li1              2.198(11)  .      1_555  N
  D1        Li1              2.198(11)  .      8_555  N
  B1        D1                1.196(4)  .      1_555  N
  B1        B2              1.6961(22)  .      1_555  N
  B1        B2              1.6961(22)  .      8_555  N
  B1        B3              1.7025(22)  .      1_555  N
  B1        B3              1.7024(22)  .      8_555  N
  B1        Li1               2.502(9)  .      1_555  N
  B1        Li1               2.502(9)  .      8_555  N
  B2        B1              1.6961(22)  .      1_555  N
  B2        B2                1.802(4)  .     11_765  N
  B2        B3              1.8284(25)  .      1_555  N
  B2        B3              1.8036(26)  .      4_765  N
  B2        B3              1.8304(25)  .      8_555  N
  B2        D2              1.2058(30)  .      1_555  N
  B2        Li1               2.500(6)  .      1_555  N
  B3        B1              1.7025(22)  .      1_555  N
  B3        B2              1.8284(25)  .      1_555  N
  B3        B2              1.8036(26)  .      4_765  N
  B3        B2              1.8304(25)  .      8_555  N
  B3        B3                1.783(4)  .      4_765  N
  B3        D3              1.1993(33)  .      1_555  N
  B3        Li1              2.613(17)  .      7_666  N
  D2        B2              1.2058(30)  .      1_555  N
  D2        Li1               2.046(5)  .      1_555  N
  D3        B3              1.1993(33)  .      1_555  N
  D3        Li1              2.076(13)  .      7_666  N
  Li1       D1               2.198(11)  .      1_555  N
  Li1       D1               2.198(11)  .      4_665  N
  Li1       B1                2.502(9)  .      1_555  N
  Li1       B1                2.502(9)  .      4_665  N
  Li1       B2                2.500(6)  .      1_555  N
  Li1       B2                2.500(6)  .      4_665  N
  Li1       B3               2.613(17)  .      7_566  N
  Li1       B3               2.613(17)  .     10_656  N
  Li1       D2                2.046(5)  .      1_555  N
  Li1       D2                2.046(5)  .      4_665  N
  Li1       D3               2.076(13)  .      7_566  N
  Li1       D3               2.076(13)  .     10_656  N

loop_
      _geom_angle_atom_site_label_1
      _geom_angle_atom_site_label_2
      _geom_angle_atom_site_label_3
      _geom_angle
      _geom_angle_site_symmetry_1
      _geom_angle_site_symmetry_2
      _geom_angle_site_symmetry_3
      _geom_angle_publ_flag
  B1        D1        Li1              89.97(11)      1_555  .      1_555  N
  B1        D1        Li1              89.96(11)      1_555  .      8_555  N
  Li1       D1        Li1          180.00000(30)      1_555  .      8_555  N
  D1        B1        B2              130.28(10)      1_555  .      1_555  N
  D1        B1        B2              130.29(10)      1_555  .      8_555  N
  D1        B1        B3              130.57(10)      1_555  .      1_555  N
  D1        B1        B3              130.57(10)      1_555  .      8_555  N
  D1        B1        Li1              61.48(12)      1_555  .      1_555  N
  D1        B1        Li1              61.48(12)      1_555  .      8_555  N
  B2        B1        B2               99.43(19)      1_555  .      8_555  N
  B2        B1        B3               65.09(11)      1_555  .      1_555  N
  B2        B1        B3               65.17(11)      1_555  .      8_555  N
  B2        B1        Li1               70.12(8)      1_555  .      1_555  N
  B2        B1        Li1             163.23(32)      1_555  .      8_555  N
  B2        B1        B3               65.17(11)      8_555  .      1_555  N
  B2        B1        B3               65.10(11)      8_555  .      8_555  N
  B2        B1        Li1             163.23(32)      8_555  .      1_555  N
  B2        B1        Li1               70.12(8)      8_555  .      8_555  N
  B3        B1        B3               98.87(20)      1_555  .      8_555  N
  B3        B1        Li1              98.17(32)      1_555  .      1_555  N
  B3        B1        Li1             118.61(22)      1_555  .      8_555  N
  B3        B1        Li1             118.61(22)      8_555  .      1_555  N
  B3        B1        Li1              98.17(32)      8_555  .      8_555  N
  Li1       B1        Li1             122.97(25)      1_555  .      8_555  N
  B1        B2        B2              112.62(15)      1_555  .     11_765  N
  B1        B2        B3                57.62(9)      1_555  .      1_555  N
  B1        B2        B3              111.99(16)      1_555  .      4_765  N
  B1        B2        B3               57.58(10)      1_555  .      8_555  N
  B1        B2        D2              123.08(24)      1_555  .      1_555  N
  B1        B2        Li1              70.23(19)      1_555  .      1_555  N
  B2        B2        B3              101.87(11)     11_765  .      1_555  N
  B2        B2        B3               61.01(12)     11_765  .      4_765  N
  B2        B2        B3               59.53(12)     11_765  .      8_555  N
  B2        B2        D2              116.15(21)     11_765  .      1_555  N
  B2        B2        Li1             161.60(33)     11_765  .      1_555  N
  B3        B2        B3               58.81(13)      1_555  .      4_765  N
  B3        B2        B3               89.97(15)      1_555  .      8_555  N
  B3        B2        D2              132.48(26)      1_555  .      1_555  N
  B3        B2        Li1              94.86(20)      1_555  .      1_555  N
  B3        B2        B3              101.81(16)      4_765  .      8_555  N
  B3        B2        D2              116.18(26)      4_765  .      1_555  N
  B3        B2        Li1               136.2(4)      4_765  .      1_555  N
  B3        B2        D2              133.10(30)      8_555  .      1_555  N
  B3        B2        Li1               113.4(4)      8_555  .      1_555  N
  D2        B2        Li1              54.33(22)      1_555  .      1_555  N
  B1        B3        B2               57.29(10)      1_555  .      1_555  N
  B1        B3        B2              112.25(16)      1_555  .      4_765  N
  B1        B3        B2                57.25(9)      1_555  .      8_555  N
  B1        B3        B3              112.70(14)      1_555  .      4_765  N
  B1        B3        D3              118.41(22)      1_555  .      1_555  N
  B2        B3        B2              102.44(16)      1_555  .      4_765  N
  B2        B3        B2               90.02(15)      1_555  .      8_555  N
  B2        B3        B3               59.90(12)      1_555  .      4_765  N
  B2        B3        D3              132.37(26)      1_555  .      1_555  N
  B2        B3        B2               59.46(14)      4_765  .      8_555  N
  B2        B3        B3               61.29(12)      4_765  .      4_765  N
  B2        B3        D3              119.08(25)      4_765  .      1_555  N
  B2        B3        B3              102.53(11)      8_555  .      4_765  N
  B2        B3        D3              129.91(24)      8_555  .      1_555  N
  B3        B3        D3              120.35(19)      4_765  .      1_555  N
  B2        D2        Li1              97.07(29)      1_555  .      1_555  N
  B3        D3        Li1               102.5(4)      1_555  .      7_666  N
  D1        Li1       D1                106.3(7)      1_555  .      4_665  N
  D1        Li1       B1               28.55(15)      1_555  .      1_555  N
  D1        Li1       B1                104.3(6)      1_555  .      4_665  N
  D1        Li1       B2               67.80(28)      1_555  .      1_555  N
  D1        Li1       B2                 88.9(4)      1_555  .      4_665  N
  D1        Li1       D2                 94.9(4)      1_555  .      1_555  N
  D1        Li1       D2               71.93(30)      1_555  .      4_665  N
  D1        Li1       D3                170.6(5)      1_555  .      7_566  N
  D1        Li1       D3                80.80(9)      1_555  .     10_656  N
  D1        Li1       B1                104.3(6)      4_665  .      1_555  N
  D1        Li1       B1               28.55(15)      4_665  .      4_665  N
  D1        Li1       B2                 88.9(4)      4_665  .      1_555  N
  D1        Li1       B2               67.80(28)      4_665  .      4_665  N
  D1        Li1       D2               71.93(30)      4_665  .      1_555  N
  D1        Li1       D2                 94.9(4)      4_665  .      4_665  N
  D1        Li1       D3                80.80(9)      4_665  .      7_566  N
  D1        Li1       D3                170.6(5)      4_665  .     10_656  N
  B1        Li1       B1                116.4(7)      1_555  .      4_665  N
  B1        Li1       B2               39.65(14)      1_555  .      1_555  N
  B1        Li1       B2                114.9(5)      1_555  .      4_665  N
  B1        Li1       D2               67.71(26)      1_555  .      1_555  N
  B1        Li1       D2                100.5(4)      1_555  .      4_665  N
  B1        Li1       D3              144.59(23)      1_555  .      7_566  N
  B1        Li1       D3                84.91(9)      1_555  .     10_656  N
  B1        Li1       B2                114.9(5)      4_665  .      1_555  N
  B1        Li1       B2               39.65(14)      4_665  .      4_665  N
  B1        Li1       D2                100.5(4)      4_665  .      1_555  N
  B1        Li1       D2               67.71(26)      4_665  .      4_665  N
  B1        Li1       D3                84.91(9)      4_665  .      7_566  N
  B1        Li1       D3              144.59(23)      4_665  .     10_656  N
  B2        Li1       B2                141.4(8)      1_555  .      4_665  N
  B2        Li1       D2               28.60(12)      1_555  .      1_555  N
  B2        Li1       D2                138.9(6)      1_555  .      4_665  N
  B2        Li1       D3              106.84(22)      1_555  .      7_566  N
  B2        Li1       D3               99.59(20)      1_555  .     10_656  N
  B2        Li1       D2                138.9(6)      4_665  .      1_555  N
  B2        Li1       D2               28.60(12)      4_665  .      4_665  N
  B2        Li1       D3               99.59(20)      4_665  .      7_566  N
  B2        Li1       D3              106.84(22)      4_665  .     10_656  N
  D2        Li1       D2                158.4(9)      1_555  .      4_665  N
  D2        Li1       D3               81.33(25)      1_555  .      7_566  N
  D2        Li1       D3                114.1(4)      1_555  .     10_656  N
  D2        Li1       D3                114.1(4)      4_665  .      7_566  N
  D2        Li1       D3               81.33(25)      4_665  .     10_656  N
  D3        Li1       D3                 92.9(7)      7_566  .     10_656  N

loop_ _atom_type_symbol
      _atom_type_number_in_cell
      _atom_type_scat_length_neutron
      _atom_type_scat_source
  D         30.0   0.6671
  International_Tables_Vol_C
  B         30.0   0.6650
  International_Tables_Vol_C
  Li         6.0  -0.2220
  International_Tables_Vol_C
_diffrn_radiation_probe                neutron
_diffrn_radiation_wavelength           1.5398
_diffrn_ambient_temperature            295
_pd_proc_ls_prof_R_factor              0.0356
_pd_proc_ls_prof_wR_factor             0.0427
_pd_proc_ls_prof_wR_expected           0.0396
_refine_ls_R_Fsqd_factor               0.06552
_refine_ls_shift/su_max                0.01
_refine_ls_shift/su_mean               0.00
_computing_structure_refinement        GSAS
_refine_ls_number_parameters           42
_refine_ls_goodness_of_fit_all         1.08
_refine_ls_number_restraints           17
_refine_ls_matrix_type                 full
_exptl_absorpt_correction_T_min        1.00000
_exptl_absorpt_correction_T_max        1.00000
_gsas_exptl_extinct_corr_T_min         1.00000
_gsas_exptl_extinct_corr_T_max         1.00000
_pd_proc_ls_peak_cutoff 0.00500
_pd_proc_info_datetime                 2014-10-20T12:59:44
_pd_calc_method                        "Rietveld Refinement"
_pd_meas_2theta_range_min              3.0
_pd_meas_2theta_range_max              167.75
_pd_meas_2theta_range_inc              0.05
_pd_proc_2theta_range_min              2.9767
_pd_proc_2theta_range_max              167.7267
_pd_proc_2theta_range_inc              0.05
_pd_meas_number_of_points              3296
_pd_proc_number_of_points              3296
_reflns_number_total                   327
_reflns_limit_h_min                    0
_reflns_limit_h_max                    7
_reflns_limit_k_min                    0
_reflns_limit_k_max                    4
_reflns_limit_l_min                    0
_reflns_limit_l_max                    19
_reflns_d_resolution_high              0.786
_reflns_d_resolution_low               6.094
#--eof--eof--eof--eof--eof--eof--eof--eof--eof--eof--eof--eof--eof--eof--eof--#
